# Supplementary material
Source: PubMed Central journal article supplement (PMC8429267)
Supplement: NIHMS1732681-supplement-1.pdf [file NIHMS1732681-supplement-1.pdf]

Supplemental Table 1 - Sex Reporting  
 Bumgarner JR, Walker II WH, and Nelson RJ, 2021. Circadian Rhythms and Pain.

| Section              | Citation                    | Species               | Sex           | Reported Rhythm/Result                                                                 |                                                                       |
|----------------------|-----------------------------|-----------------------|---------------|----------------------------------------------------------------------------------------|-----------------------------------------------------------------------|
| <b>Pain Behavior</b> | Oliverio et al., 1982       | Mouse                 | Not described | Circadian rhythms in pain behavior and morphine sensitivity                            |                                                                       |
|                      | Pickard, 1987               | Hamster               | Male          | Circadian rhythms in pain behavior                                                     |                                                                       |
|                      | Hagenauer et al., 2017      | Human                 | Female/Male   | Model of diurnal rhythm of pain sensitivity in humans generated by field meta-analysis |                                                                       |
|                      | Martínez-Gómez et al., 1994 | Rat                   | Female        | Diurnal variations in pain behavior                                                    |                                                                       |
|                      | Frederickson et al., 1977   | Mouse                 | Not described | Varying effect of morphine/naloxone on rhythmic pain behavior                          |                                                                       |
|                      | Kavaliers and Hirst, 1983   | Mouse                 | Male          | Rhythmic pain behavior, rhythmic morphine analgesia                                    |                                                                       |
|                      | Castellano et al., 1985     | Mouse                 | Not described | Varying diurnal rhythms in pain behavior between two strains of mice                   |                                                                       |
|                      | <b>DRG</b>                  | Zhang et al., 2012    | Mouse         | Male                                                                                   | Rhythmic clock gene expression, substance P expression, pain behavior |
|                      |                             | Kusunose et al., 2010 | Mouse         | Male                                                                                   | Rhythmic $\alpha 2\delta$ -1 expression                               |
| Lee et al., 2017     |                             | Mouse                 | Not described | Pro-kineticin expression (single time-point)                                           |                                                                       |
| Negri et al., 2002   |                             | Rat                   | Male          | <i>Tef</i> expression (single time-point)                                              |                                                                       |
| Yang et al., 2015    |                             | Human                 | Female/Male   | Rhythmic esophageal TRPV1 protein expression                                           |                                                                       |
| Kim et al., 2020     |                             | Mouse                 | Male          | Rhythmic TRP channel expression                                                        |                                                                       |
| <b>Spinal Cord</b>   | Morioka et al., 2012        | Mouse                 | Male          | Rhythmic clock gene expression                                                         |                                                                       |

|            |                           |            |             |                                                                           |
|------------|---------------------------|------------|-------------|---------------------------------------------------------------------------|
|            | Morioka et al., 2016      | Mouse      | Male        | Rhythmic clock gene expression                                            |
|            | Onishi et al., 2002       | Mouse      | Male        | Rev-erba expression (single time-point)                                   |
|            | Yamamoto et al., 2001     | Hamster    | Male        | <i>Per1</i> expression (single time-point)                                |
|            | Eblen-Zajjur et al., 2015 | Rat        | Male        | Rhythmic Na <sup>+</sup> /K <sup>+</sup> ATPase activity                  |
|            | Xia et al., 2016          | Mouse      | Male        | Rhythmic NR2B-CREB-CRTC1 signaling protein/gene expression, pain behavior |
|            | Xia et al., 2017          | Rat, Mouse | Male        | Rhythmic pain behavior                                                    |
|            | Zhang et al., 2012        | Mouse      | Male        | Rhythmic substance P protein expression                                   |
|            | Koyanagi et al., 2016     | Mouse      | Male        | Rhythmic ATP concentrations, SGK-1 protein/gene expression, pain behavior |
| <b>PAG</b> | Kriegsfeld et al., 2004   | Hamster    | Male        | ipRGC projections to PAG                                                  |
|            | Hattar et al., 2006       | Mouse      | Female/Male | ipRGC projections to PAG                                                  |
|            | Zhang et al., 2009        | Mouse      | Male        | SCN Prokineticin projections to PAG                                       |
|            | Landgraf et al., 2016     | Mouse      | Male        | Rhythmic PER2 expression                                                  |
|            | Takada et al., 2013       | Mouse      | Male        | Rhythmic μ-Opioid Receptor gene expression                                |
|            | Sapin et al., 2009        | Rat        | Male        | Rhythmic REM 'on' & 'off' neuronal activity                               |
| <b>RVM</b> | Monošíková et al., 2007   | Rat        | Male        | Rhythmic clock gene expression                                            |

|                     |                                |          |               |                                                                         |
|---------------------|--------------------------------|----------|---------------|-------------------------------------------------------------------------|
|                     | Hery et al., 1977              | Rat      | Male          | Rhythmic tryptophan-5-hydroxylase activity                              |
|                     | Leung and Mason, 1999          | Rat      | Male          | Rhythmic RVM On/Off neuronal activity                                   |
| <b>LC</b>           | Warnecke et al., 2005          | Mouse    | Not described | Lack of clock gene expression                                           |
|                     | Mahoney et al., 2013           | Hamsters | Male          | Rhythmic <i>Per1</i> expression                                         |
|                     | Natali et al., 1980            | Mouse    | Male          | Rhythmic tyrosine hydroxylase activity                                  |
|                     | Aston-Jones et al., 2001       | Rat      | Male          | Lack of rhythmic LC activity following dorsomedial hypothalamic lesions |
|                     | González and Aston-Jones, 2006 | Rat      | Male          | Altered sleep-wake rhythms following chemical LC lesion                 |
| <b>Thalamus</b>     | Ku et al., 2018                | Human    | Female/Male   | Rhythmic connectivity/activity                                          |
|                     | Cardoso-Cruz et al., 2011      | Rat      | Male          | Varying thalamocortical partial directed coherence across the day       |
|                     | Feillet et al., 2008           | Mouse    | Male          | Rhythmic clock gene expression                                          |
| <b>Hypothalamus</b> | Kriegsfeld et al., 2004        | Hamster  | Male          | ipRGC projections to PAG                                                |
|                     | Girotti et al., 2009           | Rat      | Male          | Rhythmic clock gene expression                                          |
|                     | Kriegsfeld et al., 2003        | Mouse    | Female        | Rhythmic <i>Per1</i> protein/gene expression                            |
|                     | Kalil et al., 2016             | Rat      | Female        | Rhythmic clock gene expression                                          |
|                     | Orozco-Solis et al., 2016      | Mouse    | Not described | Rhythmic clock gene expression                                          |

|                        |                             |                 |             |                                                                                       |
|------------------------|-----------------------------|-----------------|-------------|---------------------------------------------------------------------------------------|
|                        | Moriya et al., 2009         | Mouse           | Male        | Rhythmic clock gene expression                                                        |
|                        | Takahashi et al., 1986      | Rat             | Male        | Rhythmic met-enkephalin and $\beta$ -endorphin concentrations                         |
|                        | Asai et al., 2007           | Rat             | Male        | Rhythmic met-enkephalin and leu-enkephalin concentrations                             |
| <b>Orexin</b>          | Salomon et al., 2003        | Human           | Female/Male | Rhythmic cerebrospinal fluid orexin-A concentration fluctuations                      |
|                        | Fujiki et al., 2001         | Rat             | Male        | Rhythmic cerebrospinal fluid orexin-A concentration fluctuations                      |
|                        | Zeitzer et al., 2003        | Squirrel Monkey | Female      | Rhythmic cerebrospinal fluid orexin-A concentration fluctuations                      |
|                        | Mäkelä et al., 2018         | Human           | Male        | Lack of plasma orexin-A fluctuation                                                   |
|                        | Zhang et al., 2004          | Rat             | Male        | SCN lesions abolish cerebrospinal fluid orexin-A rhythms                              |
|                        | Marston et al., 2008        | Mouse           | Male        | Rhythmic orexin-A neuron activity                                                     |
|                        | Estabrooke et al., 2001     | Rat             | Male        | Rhythmic orexin-A neuron activity                                                     |
|                        | Gompf and Aston-Jones, 2008 | Rat             | Male        | Rhythmic orexin-A neuron activity, projections to LC with correlated activity rhythms |
|                        | Taheri et al., 2000         | Rat             | Male        | Rhythmic orexin-A protein expression in pons and hypothalamus                         |
| <b>Cortical/Limbic</b> | Li et al., 2013             | Human           | Female/Male | Rhythmic gene expression                                                              |
|                        | Woodruff et al., 2016       | Rat             | Male        | Rhythmic clock gene expression                                                        |
|                        | Chun et al., 2015           | Rat             | Female/Male | Rhythmic clock gene expression                                                        |

|                      |                           |       |               |                                                                                  |
|----------------------|---------------------------|-------|---------------|----------------------------------------------------------------------------------|
|                      | Christiansen et al., 2016 | Rat   | Male          | Rhythmic clock gene expression                                                   |
|                      | Lamont et al., 2005       | Rat   | Male          | Rhythmic clock gene expression                                                   |
|                      | Sylvester et al., 2002    | Rat   | Female        | SCN -> PVN -> PFC Projections                                                    |
|                      | Takada et al., 2013       | Mouse | Male          | Rhythmic frontal cortex $\mu$ -opioid receptor gene expression                   |
|                      | Mitsushima et al., 1996   | Rat   | Male          | Rhythmic cortical ACh release                                                    |
|                      | Chen et al., 2016         | Rat   | Male          | Disrupted circadian rhythms following insular lesions                            |
|                      | Moriya et al., 2015       | Mouse | Male          | Rhythmic serotonin and serotonin metabolite concentration fluctuations           |
|                      | Izumo et al., 2012        | Rat   | Female        | Rhythmic serotonin and dopamine expression                                       |
|                      | Hayashi et al., 2013      | Mouse | Male          | Rhythmic cortical synaptic activity and spine density                            |
| <b>Opioid System</b> | Asai et al., 2007         | Rat   | Male          | Rhythmic met-enkephalin and leu-enkephalin concentration fluctuations            |
|                      | Kurumaji et al., 1988     | Rat   | Male          | Rhythmic striatal and mesolimbic met-enkephalin expression                       |
|                      | Reid et al., 1982         | Rat   | Male          | Rhythmic hypothalamic and pituitary dynorphin expression                         |
|                      | Mozzanica et al., 1991    | Human | Not described | Rhythmic plasma Met-enkephalin and $\beta$ -endorphin concentration fluctuations |
|                      | Mozzanica et al., 1992    | Human | Female/Male   | Rhythmic plasma Met-enkephalin and $\beta$ -endorphin concentration fluctuations |
|                      | Petraglia et al., 1983    | Human | Female/Male   | Rhythmic plasma $\beta$ -endorphin concentration fluctuations                    |

|                         |                                     |               |               |                                                                                                           |
|-------------------------|-------------------------------------|---------------|---------------|-----------------------------------------------------------------------------------------------------------|
|                         | Wesche and Frederickson, 1981       | Rat           | Male          | Rhythmic whole-brain met-enkephalin concentration fluctuations                                            |
|                         | Frederickson et al., 1977           | Mouse         | Not described | Varying effect of morphine/naloxone on rhythmic pain behavior                                             |
|                         | Kavaliers and Hirst, 1983           | Mice          | Male          | Rhythmic pain behavior, rhythmic morphine analgesia                                                       |
|                         | Ibrahim et al., 2017                | Rat           | Male          | Examines green-light induced analgesia and the role of RVM activity                                       |
|                         | Martin et al., 2021                 | Rat           | Male          | Green light analgesia dependent on $\mu$ - and $\delta$ -opioid receptor signaling in the spinal cord     |
|                         | Takada et al., 2013                 | Mouse         | Male          | Rhythmic PAG/Frontal cortex $\mu$ -opioid receptor gene expression                                        |
| <b>Endocrine System</b> | Weitzman et al., 1971               | Human         | Female/Male   | Diurnal plasma cortisol concentration fluctuations                                                        |
|                         | Albers et al., 1985                 | Hamsters      | Male          | Rhythmic serum cortisol/corticosterone concentration fluctuations                                         |
|                         | Heybach and Vernikos-Danellis, 1978 | Rat           | Male          | Adrenalectomy does not abolish diurnal variations in pain behavior                                        |
|                         | Koyanagi et al., 2016               | Mouse         | Male          | Rhythmic corticosterone secretion necessary for diurnal neuropathic pain behavior                         |
|                         | Bremner et al., 1983                | Human         | Male          | Rhythmic androgen concentration fluctuations                                                              |
|                         | Spies et al., 1974                  | Rhesus Monkey | Female        | Rhythmic serum progesterone and estradiol concentration fluctuations during luteal phase of estrous cycle |
| <b>Immune System</b>    | Hayashi et al. 2013                 | Mouse         | Male          | Microglia-driven rhythmic cortical synaptic activity and spine density                                    |
